# Supplementary material for: Solventless synthesis of cerium oxide nanoparticles and their application in UV protective clear coatings
Source: Royal Society of Chemistry journal article supplement (doi:10.1039/d0ra01710h), 2020-01-01
Supplement: d0ra01710h1.pdf [file d0ra01710h1.pdf]

**Supplementary information**

**Solventless synthesis of cerium oxide nanoparticles and its application in UV  
protective clear coating**

Rubén Álvarez Asencio<sup>a</sup>, Robert W. Corkery<sup>b</sup>, Anwar Ahniyaz<sup>a\*</sup>,

<sup>a</sup> RISE Research Institutes of Sweden, Division of Bioscience and Materials, SE-114 86  
Stockholm, Sweden.

<sup>b</sup> KTH Royal Institute of Technology, School of Engineering Sciences in Chemistry,  
Biotechnology and Health.

\* Corresponding author. E-mail: [anwar.ahniyaz@ri.se](mailto:anwar.ahniyaz@ri.se)

14

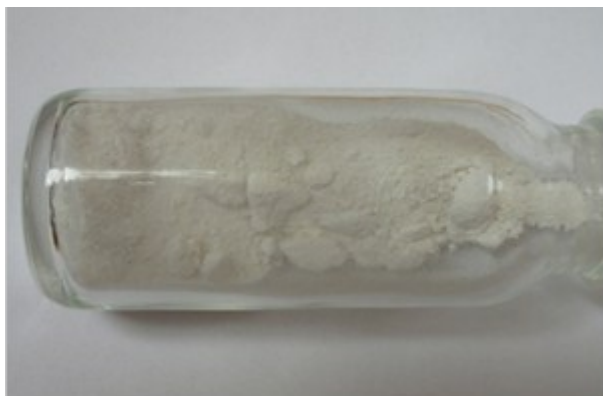

15

16 **SI-1.** Photograph of white cerium oleate powder.

17

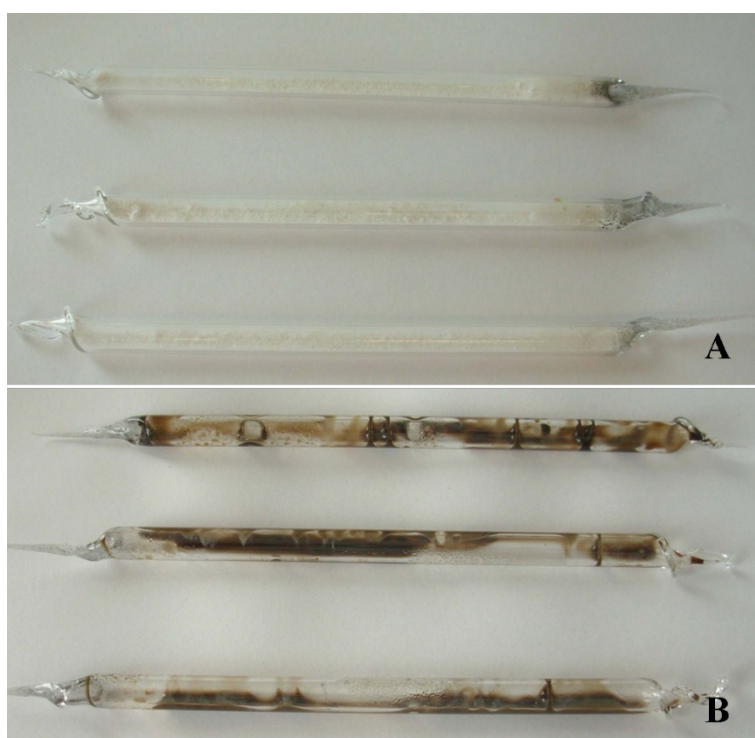

18

19 **SI-2.** Snapshots of three samples before (A) and after (B) thermal decomposition of  
20 cerium oleate at 320 °C for 0.7 h at 0.3 mbar.

21

22 The yield of this method was calculated based on one of the ampoules. The ampoule  
23 containing 0.13 g of cerium oleate (0.000132 mol, 945.5 gr/mol) yielded 0.05 g of oleate  
24 coated ceria after the thermal decomposition described above. These 0.05 g were burned  
25 at 600 °C for 1 hour to remove the organics resulting into 0.016 g of cerium dioxide  
26 (172.12 g/mol). Theoretically, as the relation between ceria and cerium-oleate is 1:1  
27 (molar), 0.13 g of cerium-oleate should generate 0.023 g of CeO<sub>2</sub>. Equations (1) and (2)  
28 show the calculations needed to calculate the yield. M is the molecular mass (g/mol),  
29  $m_{\text{ceria,t}}$  is the ceria theoretical mass (g),  $m_{\text{sample,0}}$  is the initial sample mass of the cerium-  
30 oleate (g) and  $m_{\text{ceria,e}}$  is the ceria experimental mass (g) obtained after thermal  
31 decomposition (g). Thus, considering that no side products were obtained, the yield of  
32 this solventless process was about 70 %.

33

$$m_{ceria,t} = \frac{M_{ceria}}{M_{cerium - oleate}} m_{sample,0}$$

34

35 (1)

36

$$Y = \frac{m_{ceria,t}}{m_{ceria,e}} \cdot 100\%$$

37

38 (2)

39

40

41

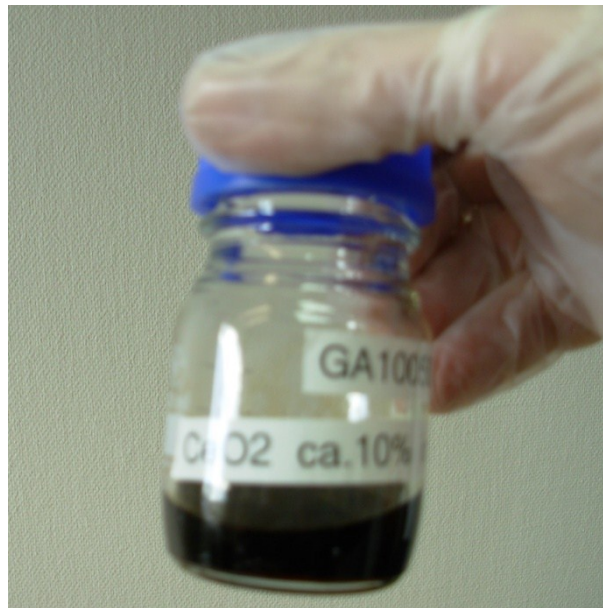

42

43

44 **SI-3.** Photograph of 10 wt% hexane dispersion of cerium oxide nanoparticles prepared  
45 at 320°C, 0.7 h and 0.3 mbar.

46

47 SI-3 shows a 10 wt% hexane dispersion of ceria nanoparticles with a dark brownish color.  
48 No precipitation and no phase separation were observed after storing the dispersion for  
49 more than 3 years in the lab.

50
